# Supplementary material for: The mechanism of an enzymatic reaction-induced SERS transformation for the study of enzyme–molecule interfacial interactions
Source: Royal Society of Chemistry journal article supplement (doi:10.1039/c6cp05978c), 2016-01-01
Supplement: c6cp05978c1.pdf [file c6cp05978c1.pdf]

## Supporting Information

# Mechanism of an Enzymatic Reaction-Induced SERS Transformation for the Study of Enzyme-Molecule Interfacial Interactions

Zhi Yu<sup>†, ‡, ||</sup>, Lei Chen<sup>§</sup>, Yeonju Park<sup>‡</sup>, Qian Cong<sup>|| \*</sup>, Xiaoxia Han<sup>†</sup>, Bing Zhao<sup>†</sup> and  
Young Mee Jung<sup>‡\*</sup>

<sup>†</sup>*State Key Laboratory of Supermolecular Structure and Materials, Jilin University,  
Changchun, 130012, P. R. China.*

<sup>‡</sup>*Department of Chemistry, Institute for Molecular Science and Fusion Technology,  
Kangwon National University, Chunchon 24341, Korea.*

<sup>§</sup>*Key Laboratory of Preparation and Applications of Environmental Friendly  
Materials, Ministry of Education, Jilin Normal University, Siping 136000, P.R. China.*

<sup>||</sup>*Key Laboratory for Bionic Engineering of Ministry of Education, Jilin University,  
Changchun 130025, P.R. China.*

\*To whom all correspondence should be addressed.

E-mail: ymjung@kangwon.ac.kr (Y.M.J.); congqian@jlu.edu.cn (Q.C.),

**Figure S1**

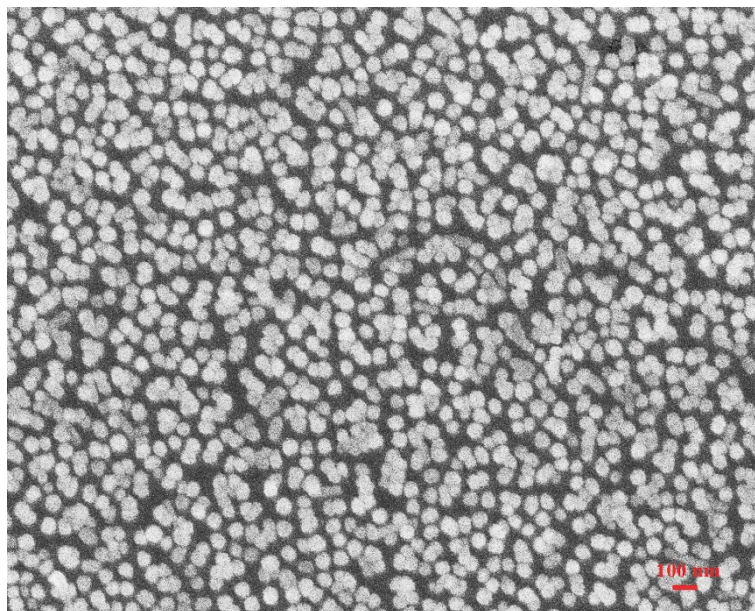

**Figure S1.** SEM image of the silver nanoparticle-decorated substrate. The surface of the glass slide was covered with 70 nm silver nanoparticles. The scale bar is 100 nm.

## Study of the enzymatic reaction kinetics

Herein, the Michaelis-Menten model was used to account for the observed dependence of the SERS intensity on the glucose concentration. The model assumes the following reaction mechanism:<sup>1-5</sup>

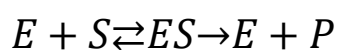

where E, S, ES and P are the enzyme, substrate (in this case, glucose), enzyme-substrate complex and product, respectively. The mechanism assumes that a quasi-equilibrium is established between the enzyme-substrate complex and the free enzyme and free complex, as implied by the double arrow. Subsequently, the enzyme-substrate complex concentration can be approximated by the following equation:

$$\frac{[E][S]}{[ES]} = K_M \quad (1)$$

Note that in the equation  $[E]=[E]_0-[ES]$ , in which  $[E]_0$  is the initial enzyme concentration, one can substitute for  $[E]$  in Eq. 1 to derive the following equation:

$$[ES] = \frac{[E]_0[S]}{K_M + [S]} \quad (2)$$

The quantity proportional to the enzyme complex concentration  $[ES]$  was calculated using the decrease in the intensity of the  $998 \text{ cm}^{-1}$  band as a function of glucose concentration. During the reaction, it could be easily concluded from Fig. S3 that the glucose concentration  $[S]$  is inversely proportional to the SERS intensity of the band at  $998 \text{ cm}^{-1}$  ( $I_c$ ). Therefore,  $[S]$  is proportional to  $I_0-I_c$ . Therefore, we obtain the

relationship  $[ES] \propto \frac{I_o - I_c}{I_o}$ , in which  $I_o$  is the SERS intensity of the 998  $\text{cm}^{-1}$  band at zero glucose concentration and  $I_c$  is the SERS intensity of that band at concentration  $c$ .

Accordingly, Eq. (2) can be rewritten as:

$$\frac{I_o - I_c}{I_o} = \frac{\sigma[E]_o[S]}{K_M + [S]} \quad (3)$$

in which  $\sigma$  is a constant of proportionality (with dimensions  $\text{M}^{-1}$ ). Fitting Eq. (3) to the data given in Fig. S3 produced the fit from which the value  $K_M = 8.2 \times 10^{-6} \text{ M}$  was derived.

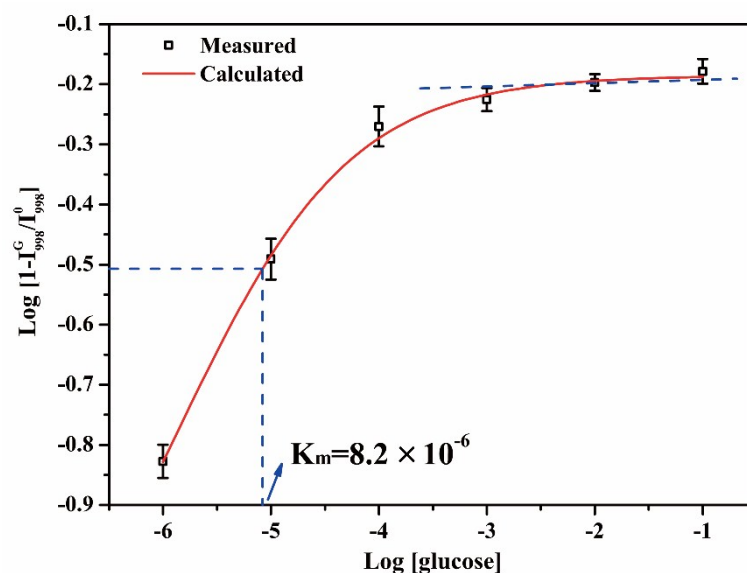

**Figure S2.** Study of the enzymatic reaction kinetics using the Michaelis-Menten model

**Figure S3**

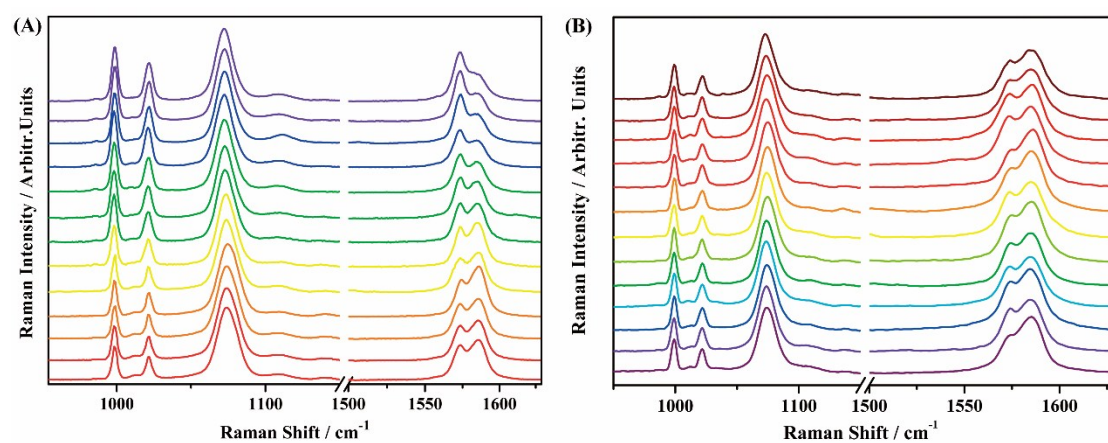

**Figure S3.** Normalized SERS spectra of MBA anchored to AgNP-coated glass slides upon exposure to a  $10^{-6}$  M glucose solution with (B) and without (A) a deoxygenation process with increasing immersion time.

**Figure S4**

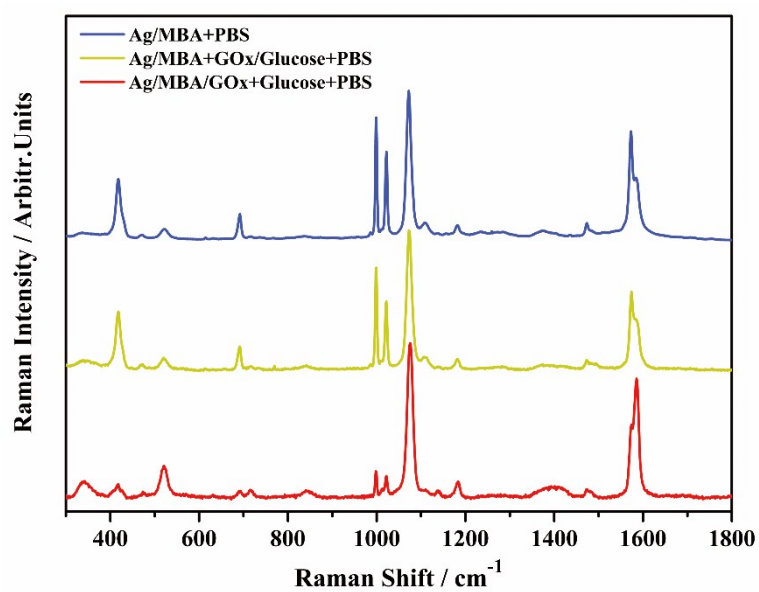

**Figure S4.** The SERS spectra of Ag/MBA with (a) immersion of the Ag/MBA complex in a mixed solution of Gox and glucose and (b) immersion of the Ag/MBA/Gox complex in a glucose solution (c).

**Figure S5**

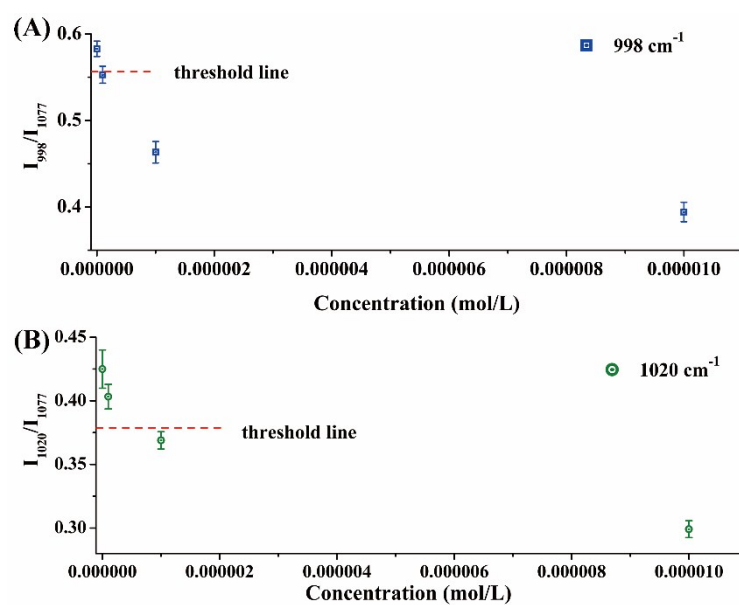

**Figure S5.** The SERS relative intensity ratio of the bands  $I_{998}/I_{1077}$  (A) and  $I_{1020}/I_{1077}$  (B) as a function of the glucose concentration, where the threshold line indicates the position 3 standard deviations from the value for the blank sample.

## References

- 1 Duke FR, Weibel M, Page DS, Bulgrin VG, Luthy J. Glucose oxidase mechanism. Enzyme activation by substrate. *J. Am. Chem. Soc.* 1969; **91**: 3904-3909.
- 2 Nakamura T, Ogura Y. Kinetic Studies on the Action of Glucose Oxidase. *J. Biochem.* 1962; **52**: 214-220.
- 3 Nakamura T, Nakamura S, Ogura Y. Semiquinone and Enzyme Kinetics of D-Amino Acid Oxidase. *J. Biochem.* 1963; **54**: 512-519.
- 4 Nakamura T, Yoshimura J, Ogura Y. Action Mechanism of the Old Yellow Enzyme. *J. Biochem.* 1965; **57**: 554-564.
- 5 Weibel MK and Bright HJ. The Glucose Oxidase Mechanism. *J. Biochem.* 1971. **246**. 2734-2744.
